# The association between real-world experiential diversity and event cognition

Carl J. Hodgetts<sup>1,2,\*</sup>, Mark Postans<sup>2,3</sup>, & Angharad N. Williams<sup>4,5</sup>

1. Department of Psychology, Royal Holloway, University of London, Egham, Surrey, TW20 0EX, UK

2. Cardiff University Brain Research Imaging Centre, School of Psychology, Cardiff University, Maindy Road, Cardiff, CF24 4HQ, UK

3. Communicable Disease Surveillance Centre, Public Health Wales, Number 2 Capital Quarter, Tyndall Street, Cardiff, CF10 4BZ, UK

4. Department of Psychology, Chaucer, Nottingham Trent University, 50 Shakespeare Street, Nottingham, NG1 4FQ

5. Adaptive Memory Research Group, Max Planck Institute for Human Cognitive and Brain Sciences, Stephanstraße 1A, D-04103, Leipzig, Germany

\* Corresponding author

---

## Abstract

The ability to effectively parse our experience into meaningful events is thought to be critical for structuring episodic memory, engaging in daily activities, and navigating the social and spatial environment. Despite this, little is known about how inter-individual variation in this ability emerges. Within a sample of 159 young adults, we found that the degree to which individuals were exposed to a diverse range of social and spatial experiences (experiential diversity) was significantly related to event segmentation, such that individuals with greater daily variation in their social and spatial lives produced more fine-grained event segmentations during a movie-viewing task. Moreover, this effect remained when controlling for potential confounds, such as anxiety and loneliness. These results provide new insights into how real-world experiences may shape key memory encoding mechanisms, providing a potential cognitive pathway through which social disconnectedness impacts cognitive health and wellbeing.

**Keywords:** environmental enrichment; event cognition; episodic memory; social isolation

---

## Introduction

While the world is in constant flux, we nonetheless experience our daily lives as a series of discrete events with beginnings and endings. This ability to carve experience into distinct chunks is thought to depend on the detection of event boundaries. Event segmentation theory proposes that these boundaries emerge from a prediction error signal elicited by shifts in either situational features (e.g., spatial location, people present) or internal states (e.g., arousal, goals)<sup>1,2</sup>. Once an error threshold is met, these boundaries trigger the generation of a new event model (a structured representation of an event within a specific spatiotemporal context) and the encoding of the

36 previous event model into long-term memory<sup>3,4</sup>. Prior work has shown that these boundaries can  
37 be readily measured by asking participants to watch a video and press a button whenever one  
38 natural and meaningful unit of activity ends and another begins<sup>5</sup>. Notably, the granularity at which  
39 people place event boundaries seems to be predictive of event memory<sup>6</sup>, suggesting that event  
40 segmentation exerts an important influence on how events in long-term memory are organised  
41 and subsequently recalled. In line with this, event boundaries also seem to engage the same ‘core’  
42 network of brain structures thought to support episodic remembering, including the  
43 hippocampus and posteromedial cortex<sup>7-10</sup>.

44 Despite the importance of event perception for many aspects of our psychological lives  
45 (e.g., episodic memory, navigation, motor planning, social cognition)<sup>11-14</sup>, there is a surprisingly  
46 limited understanding of how – and *why* – this ability differs across individuals, particularly within  
47 more naturalistic contexts. While previous work has emphasised high inter-subject agreement in  
48 where specific event boundaries are placed, considerable individual differences are nonetheless  
49 still observed<sup>15</sup>. This is perhaps unsurprising given that large individual differences in the  
50 granularity and detail of personal event memories are also readily seen, even within younger  
51 samples<sup>16,17</sup>. Given its intrinsic link to changes in the external world<sup>2,4</sup>, a pertinent question is how  
52 event segmentation ability may be influenced directly by variability in day-to-day experiences.  
53 While many people around the globe exist within highly dynamic environments, offering  
54 considerable opportunity for experiential diversity, there are nonetheless clear differences in  
55 individuals’ capacity to *exploit* this opportunity (e.g., due to isolation, loneliness, and poor physical  
56 and mental health)<sup>18</sup>. The goal of this study is to examine how such real-world experiential  
57 differences may influence the how events are perceived and encoded.

58 Support for a potential link between event cognition and experiential diversity comes from  
59 studies of environmental enrichment in animals, which suggest that enriched environments  
60 (which afford a diverse range of experiences and social interactions) lead to improvements in  
61 spatial-episodic memory, as well as neurogenesis in a network of brain structures linked to event  
62 cognition more broadly, such as the hippocampus and prefrontal cortex<sup>19-21</sup>. Similarly, in humans,  
63 low levels of *social*/experiential diversity (which may be characterised by the number and  
64 frequency of social contacts) is associated with poorer memory performance in older adults<sup>22,23</sup>, as  
65 well as increased risk of cognitive decline<sup>24-26</sup>. In the context of *environmental* experiential  
66 diversity, a recent study found that individuals who experienced more complex, irregular  
67 environments in childhood (e.g., rural areas or more ‘organic’ European cities) had improved  
68 spatial memory ability in later life<sup>27</sup>. At a shorter timescale, it has been found that regular exposure  
69 to a rich environment in the videogame Minecraft led to improvements in behavioural pattern  
70 separation, such that participants that were allowed to explore and create more complex and

71 expansive environments were better able to distinguish between old items and highly similar lures  
72 in a separate memory task<sup>28</sup>. While these studies do not provide evidence for a link between  
73 experiential diversity and event perception specifically, they nonetheless indicate that day-to-day  
74 variation in our experiences (such as large social networks and complex spatial environment)  
75 exerts a strong influence on the ability to form rich and distinct mnemonic representations, which  
76 may feasibly arise via key memory encoding mechanisms such as event segmentation<sup>2</sup>.

77 To address this question, we examined the relationship between real-world experiential  
78 diversity and event segmentation ability, with the prediction that lower experiential diversity is  
79 associated with fewer event boundaries perceived during a naturalistic viewing paradigm. This  
80 prediction is not only based on evidence that experiential diversity has a detrimental effect on  
81 event memory and its underlying neural mechanisms (described above), but also reflects evidence  
82 that expertise within a particular domain (e.g., expertise in a particular sport) leads to more fine-  
83 grained segmentation of events within that domain<sup>29</sup>, and may well reduce mnemonic  
84 interference (e.g., ref. <sup>30</sup>). To test this prediction, we collected a range of measures designed to  
85 assess various aspects of social and environmental diversity across a 30-day period, which together  
86 constituted our composite measure of experiential diversity (see Methods). By collecting data both  
87 on individuals' spatial and social environment, we were also able to examine the potential  
88 differential contribution of each form of diversity on event perception (see e.g., ref. <sup>31</sup>). Partial  
89 COVID-19 restrictions at the time of testing in the United Kingdom  
90 (<https://www.gov.uk/government/publications/step-2-covid-19-restrictions-posters-12-april-2021>)  
91 also provided a unique opportunity to study high inter-individual variability in experiential  
92 diversity within a young healthy sample of participants. In these same participants, we applied an  
93 event segmentation task, in which participants watched a short film and marked boundaries in  
94 their experience<sup>8,9</sup>. Critically, this film involves dynamic social interactions across multiple scenes  
95 and locations and is therefore ideal to examine the cognitive-perceptual consequences of social  
96 and spatial experiential diversity.

97

## 98 **Methodology**

### 99 **Participants**

100 All participants were recruited from the participant recruitment platform Prolific  
101 (<https://prolific.ac>) and reimbursed for their participation at a rate of £8.49/hr. Participants were  
102 between 18-35 years of age, UK residents, fluent English speakers and had no current or previous  
103 neurological or psychiatric conditions. Based on *a priori* power analysis, we aimed to collect a total  
104 of 153 complete datasets in a sample of young adult participants (which would provide 80%  
105 power to detect a one-tailed, small-to-moderate effect size of  $r = 0.2$ ). A total of 177 participants

106 engaged with the study on Prolific, and 159 provided complete data for all variables of interest  
107 (mean age = 26.4; SD = 5.3; range = 18-35; 92 females, 65 males, 1 trans demi-boy, and 1 non-  
108 binary). This study was approved by the Royal Holloway Department of Psychology Research  
109 Ethics Committee (ethical approval reference 2171).

110  
111

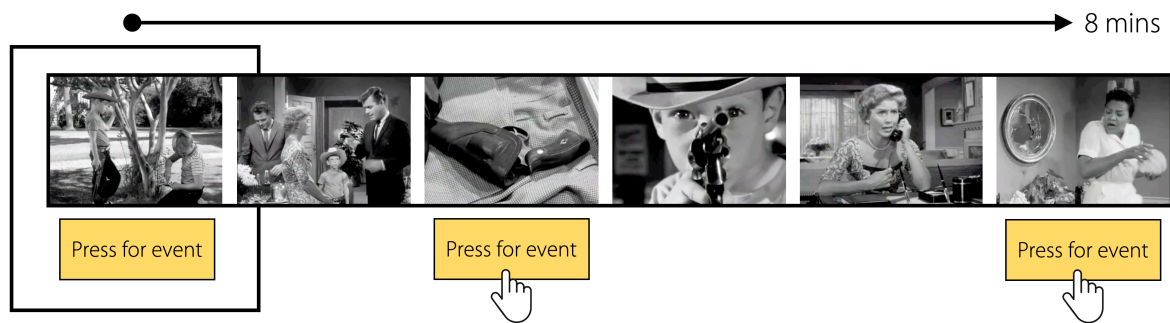

112

113 **Figure 1. The event segmentation task.** The event segmentation task involved the presentation  
114 of the 8-minute movie “Bang! You’re Dead”. The movie was shown above an on-screen button,  
115 which participants could press to mark meaningful events that they perceived.

116

117

## 118 **Procedure and materials**

119 Participants from Prolific were directed to Qualtrics ([www.qualtrics.com](http://www.qualtrics.com)) to complete the  
120 experiment. The paradigm was optimised for computers, phones, and tablets.

121

### 122 ***Event segmentation task***

123 We used an event segmentation task that has been applied in recent functional MRI studies of  
124 event perception<sup>8,9</sup>. Here, participants watched an abridged version of Alfred Hitchcock’s black-  
125 and-white television drama “Bang! You’re Dead”<sup>32</sup>. This film was chosen as it is highly suspenseful,  
126 but also involves several social interactions across multiple scenes. This contrasts with many other  
127 studies of event segmentation that have mainly used videos depicting a single agent performing  
128 action sequences or daily activities<sup>5,14,33</sup>. Importantly, also, no participant reported seeing this film  
129 before, meaning that perceived events were not driven by prior knowledge of the film itself.

130 During the movie, participants were required to press an on-screen button (using their mouse or  
131 phone/tablet touchscreen) whenever they judged one event to end and another to begin (Figure  
132 1). They were instructed that there were “no right answers in this task” and to just respond in a way  
133 that feels natural to them. The main measure of event segmentation was the total number of  
134 perceived event boundaries per participant (i.e., the total number of button presses during the  
135 movie; e.g., refs<sup>29,34</sup>).

### 136 ***Experiential diversity***

137 The experiential diversity measure was designed to capture the diversity of each participant's  
138 'social' and 'spatial' experiences over the preceding 30 days. The *social experiential diversity* score  
139 was comprised of two sub-scales. The first included several questions which assessed the  
140 regularity and format of recent social interactions (see Supplementary Information, Appendix A),  
141 and scores could range from 0-6. The second sub-scale was a measure of social network size,  
142 adapted from previous studies of social cognition<sup>35,36</sup>. For this, participants were asked to write the  
143 initials of every individual with whom they had had meaningful social contact or communication  
144 over the last 30 days. This questionnaire is thought to probe the second layer of an individual's  
145 social network (the 'sympathy group'; see ref. <sup>37</sup>), and the 30-day limit is thought to maximise  
146 variation across individuals while also minimising the time and effort required to complete the  
147 questionnaire. The social experiential diversity score was a composite of these sub-scales and  
148 ranged from 3-50 (mean = 15.9, SD = 8). The *spatial experiential diversity* questionnaire was  
149 designed to assess the complexity of each participant's immediate environment, including the  
150 number of rooms number they spend their time in on a typical day, access to private outdoor  
151 space, and the frequency in which they explore their local neighbourhood (see Supplementary  
152 Material, Appendix B). Scores on this measure could range from 0-16 (mean = 7.9, SD = 3, range in  
153 sample = 0-13). Scores on the social and spatial measures were combined into an overall  
154 experiential diversity score (mean = 23.8, SD = 9.3, range = 5-60).

### 156 ***Other questionnaires***

157 In addition to our main measures above, we also collected data on several covariates of interest.  
158 The first of these was The Campaign to End Loneliness Measurement tool<sup>38</sup>, which is a 3-item tool  
159 to assess subjective feelings of loneliness. The three items on this tool are: "1. I am content with my  
160 friendships and relationships"; "2. I have enough people I feel comfortable asking for help at any  
161 time"; "3. My relationships are as satisfying as I would want them to be". Participants could respond  
162 to each statement on a 5-point scale: 'Strongly disagree' (coded as 4 points), 'Disagree' (coded as 3  
163 points), 'Neutral' (coded as 2 points), 'Agree' (coded as 1 point), and 'Strongly agree' (coded as 0  
164 points). This coding scheme produces scores ranging from 0-12, where higher scores indicate  
165 higher levels of subjective loneliness. To control for general feelings of anxiety (see Results),  
166 participants also completed the trait component of the State-Trait Anxiety Inventory (STAI-T)<sup>39</sup>. The  
167 STAI-T contains 20 items assessing the frequency of anxiety generally felt by participants, and  
168 participants respond on a four-point scale from 'Almost' to 'Almost Always'. Scores can range from  
169 20-80 with high scores indicating high levels of general anxiety.

170

171 **Statistical analysis**

172 All statistical analyses were conducted using R (version 4.0.2; R Core Team, 2019) in RStudio  
173 (version 1.4.1106; RStudio Team, 2021). Key correlational analyses (e.g., between total experiential  
174 diversity and event segmentation frequency) were conducted using two-tailed bivariate  
175 correlations, with the contribution of potential covariates explored using partial correlations and  
176 multiple regression analyses (see Results). Partial correlations were carried out using the 'ppcor'<sup>40</sup>  
177 package in R. Comparisons between correlation coefficients were performed using Steiger Z-tests  
178 (Steiger, 1980) within the 'cocor' package in R<sup>41</sup>.

179

180 **Results**

181 **Experiential diversity is strongly correlated with event segmentation**

182 We predicted that experiential diversity would be positively associated with event segmentation  
183 ability, such that individuals who report greater variation in their spatial and social world would  
184 show more fine-grained event boundary segmentation. Initially, a bivariate Pearson's correlation  
185 was conducted between total experiential diversity and the number of event boundaries  
186 perceived (see Methods). Consistent with our predictions, we observed a significant positive  
187 correlation between experiential diversity and event segmentation frequency ( $r(157) = 0.27, p =$   
188  $0.0006$ ; Figure 2).

189

190

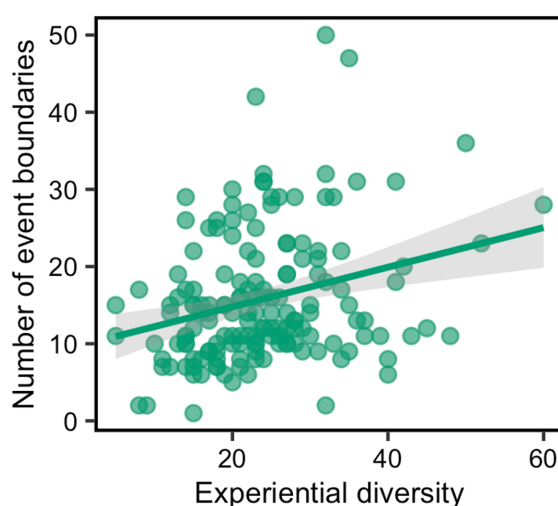

191

192 **Figure 2. The relationship between total experiential diversity and the number event**  
193 **boundaries perceived.** Each data point reflects an individual participant and there are 159 data  
194 points shown on the plot. The shaded area represents the 95% confidence interval on the best-  
195 fitting regression line.

196

### 197 **Controlling for anxiety and loneliness**

198 One possible explanation for this finding is that individuals with smaller social support networks,  
199 or with limited access to diverse spatial environments, display greater anxiety, as well as loneliness.  
200 Systematic biases in event memory, such as a propensity to recall more extended generalised  
201 events, may be a hallmark of mood disorders<sup>42-44</sup>. As such, it is possible that such memory biases  
202 also drive variation in how events are initially perceived and encoded. To test for this, we  
203 conducted a multiple regression with event segmentation as the outcome measure and  
204 experiential diversity, anxiety, and loneliness as the predictors. The effect between experiential  
205 diversity and event segmentation was found to hold when controlling for both anxiety and  
206 loneliness ( $\beta = 0.25$ ,  $p = 0.0007$ ). Notably, there were also no independent relationships between  
207 event segmentation ability and either anxiety ( $p = 0.09$ ) or loneliness ( $p = 0.17$ ), suggesting that  
208 this effect is not driven by the subjective 'quality' of individuals' social interactions, or anxiety  
209 linked to isolation, but rather by the objective diversity of these experiences.

210  
211

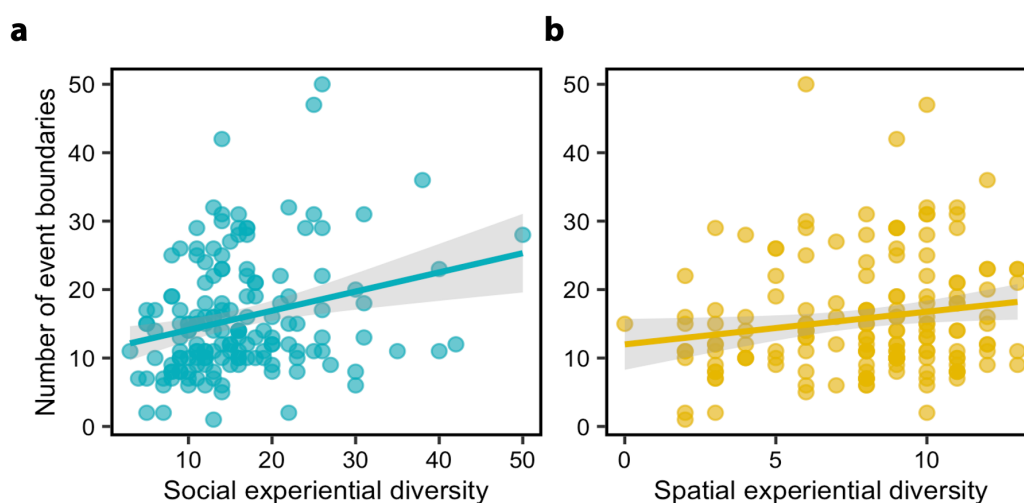

212

213 **Figure 3. The relationship between social and spatial experiential diversity and event**  
214 **segmentation.** Each data point reflects an individual participant and there are 159 data points  
215 shown on the plot. The shaded areas represent the 95% confidence interval on the best-fitting  
216 regression line.

217

218

### 219 **The differential contribution of 'social' and 'spatial' experiential diversity**

220 We next examined the relative contribution of social and spatial experiential diversity measures to  
221 event segmentation. While both sub-measures are significantly associated with experiential  
222 diversity (at  $p = 0.05$ ), the effect is stronger numerically for *social* ( $r(157) = 0.25$ ,  $p = 0.001$ ; Figure 2)

223 relative to *spatial* ( $r(157) = 0.17, p = 0.03$ ; Figure 2) experiential diversity – though these  
224 correlations do not differ significantly ( $z = 0.96, p\text{-value} = 0.34$ ). A separate question is whether  
225 social or spatial components of experiential diversity make independent contributions to event  
226 segmentation. Indeed, when spatial experiential diversity is controlled for within in a multiple  
227 regression model, social experiential diversity still significantly accounts for the variation in event  
228 boundary perception ( $\beta = 0.24, p = 0.006$ ). Overall, these results suggest that social experiential  
229 diversity is main contributor to event perceptual ability in this study.

230

## 231 **Discussion**

232 In the current study, we examined whether inter-individual differences in experiential diversity is  
233 associated with inter-individual variation in the ability to perceive events in ongoing experience.  
234 To assess this, we related event segmentation (the number of perceived event boundaries) during  
235 a naturalistic movie stimulus to measures of both social and spatial experiential diversity, such as  
236 the frequency and quality of social interactions, and the capacity to explore the immediate spatial  
237 environment (e.g., household, local neighbourhood). Our results yielded several key findings in  
238 relation to this question. First, we found that experiential diversity was strongly related to how  
239 many event boundaries were perceived during the movie viewing task, such that participants who  
240 had recent exposure to a wider range of social and spatial experiences provided more fine-grained  
241 segmentations of events as they unfolded. Second, we found that this effect held when controlling  
242 for anxiety and loneliness, addressing the possibility that this effect reflects variation in  
243 mood/anxiety linked to isolation. Thirdly, when comparing social and spatial aspects of  
244 experiential diversity, we found that social context accounted for more of the variation in event  
245 perception (though these correlations did not significantly differ from one another when  
246 compared directly).

247 The key question for the current study is what are the cognitive and/or neural mechanisms  
248 underlying this relationship. One possibility is that experiential diversity influences event  
249 perception by altering the functional ‘integrity’ of a core network in the brain, which is has been  
250 implicated in both event perception<sup>7,9,45</sup> and memory<sup>46,47</sup>. As briefly outlined in the Introduction,  
251 previous studies suggest that social and environmental enrichment may influence memory via  
252 functional changes in the hippocampus and interconnected structures<sup>48,49</sup>. For example, isolated  
253 mice show marked decline in spatial memory when compared to those housed in groups, and this  
254 is associated with a host of micro- and macro-structural changes in the hippocampus and  
255 prefrontal cortex (e.g., demyelination, neuroinflammation and synaptic protein loss)<sup>50,51</sup>. Notably,  
256 these changes in cognitive and neural markers may also be mitigated by exposure to complex and  
257 enriched spatial environments<sup>52</sup>. Similarly, re-socialization of previously isolated mice has been



258 shown to reverse the negative consequences of social isolation on hippocampal plasticity<sup>53</sup>. These  
259 laboratory studies in nonhuman species underline the intimate relationship between *immediate*  
260 social and spatial experience and the structural-functional integrity of the brain's event memory  
261 system<sup>24,31,54,55</sup>.

262 In human participants, it has been shown that reduced social contact impairs memory in  
263 older adults<sup>23</sup>, and has been shown to increase risk of developing Alzheimer's disease<sup>25</sup>. In  
264 particular, it has been suggested that social isolation may act as a stressor which impacts primarily  
265 the extended hippocampal memory system, leading to pathophysiological changes that lead to  
266 memory decline and Alzheimer's disease<sup>56</sup>. While very few studies have examined the influence of  
267 low experiential diversity on brain structure and function in humans, those conducted have found  
268 that regions implicated in event memory and social cognition (such as hippocampus,  
269 parahippocampal cortex, and amygdala) may be most susceptible to isolation and loneliness<sup>57</sup>. For  
270 instance, one particular study found that individuals who underwent sudden and prolonged  
271 isolation (polar expeditioners) showed lower hippocampal volumes when compared to matched  
272 controls<sup>58</sup>. Focusing more directly on spatial aspects of experiential diversity, a recent study by  
273 found that individuals who engaged in more complex exploratory behaviour in their local  
274 neighbourhood (i.e., as measured by the metric 'roaming entropy') were found to have increased  
275 positive affect, and this relationship itself was linked to hippocampal-striatal connectivity<sup>18</sup>.

276 While many studies point towards reductions in key brain structural measures (e.g., grey  
277 matter volume), a recent large-scale study in middle-to-old aged adults found that enduring  
278 feelings of isolation (i.e., 'trait' loneliness) were associated with increased structural connectivity in  
279 the fornix – a prominent white matter tract that links the hippocampus/subiculum and prefrontal  
280 cortex<sup>59</sup>. Rooted in the potential role of this pathway in episodic memory and simulation<sup>60</sup>, this  
281 enhanced connectivity in lonely individuals may reflect a heightened focus on internally-  
282 generated thoughts (e.g., socially-themed episodic memories and simulations)<sup>61</sup>. It is possible,  
283 therefore, that increases in both social and non-social imagination (arising from reduced levels of  
284 experiential diversity) may well consume resources within the event memory system and impair  
285 participants' ability to effectively monitor shifts in events as they unfold<sup>59</sup>. Another possible  
286 interpretation of these findings is that high experiential diversity influences event segmentation in  
287 a similar manner to that seen in expertise, such that individuals with high social or spatial  
288 experiential diversity can use their recent knowledge within those domains to guide segmentation  
289 (e.g., via top-down attentional mechanisms). For example, in a recent study, basketball experts  
290 were found to produce more event boundaries compared to novices when watching basketball  
291 games, particularly when asked to focus on fine-level events<sup>29</sup> (but see ref. <sup>62</sup>). In the current  
292 investigation, therefore, it may be that participants' segmentations align at the coarse-level (e.g.,

293 for large scene changes, or major plot points) but that individuals with greater experiential  
294 diversity had increased sensitivity to finer-scale, sub-events linked to subtle changes in spatial  
295 and/or social cues. Due to how this experiment was administered, we were unable to determine  
296 *when* boundaries were placed, and so cannot ascertain which situational features were most  
297 salient for individual subjects<sup>6</sup>. For example, it may be the case that the correlation between social  
298 experiential diversity and overall event segmentation reflected predominantly variation in  
299 participants' ability to attend to, and process, social versus non-social features of events (e.g.,  
300 character interactions, facial expressions, character intentions)<sup>11</sup>.

301 Previous studies have also found that lonely individuals have enhanced vigilance to  
302 negative social information<sup>63</sup>, suggesting that lower social experiential diversity could, in specific  
303 contexts, result in enhanced sensitivity to negative events or sub-events. It is, however, important  
304 to state that loneliness itself did not relate to event segmentation in the current study, and in fact  
305 the relationship between experiential diversity and segmentation ability held when controlling for  
306 loneliness. This is important as it implies that reduced social contact may be sufficient to impose  
307 real-world psychological costs – even without associated feelings of loneliness.

308 While prior studies have suggested high inter-subject agreement to be a hallmark of event  
309 segmentation<sup>64</sup>, the current study demonstrates that there are nonetheless considerable  
310 individual differences in how events are perceived, particularly regarding the granularity of event  
311 boundary placement – even in young adults. The observation of large individual differences is not  
312 wholly unsurprising given known individual variation in how people retrieve real-world events<sup>16,17</sup>.  
313 One explanation for the higher inter-individual variation seen here is the actual stimulus used.  
314 While many classic studies of event boundary segmentation have focused on basic action  
315 sequences with a single agent<sup>6</sup>, we instead opted for a richer stimulus, which involves the dynamic  
316 tracking of location and character, as well as their intentions and emotions across scenes. As such,  
317 this stimulus may be more amenable to detecting individual differences aligned to experiential  
318 factors.

319 We must also highlight that this study was conducted as COVID-19 restrictions were being  
320 slowly relaxed in the United Kingdom ([https://www.gov.uk/government/publications/step-2-](https://www.gov.uk/government/publications/step-2-covid-19-restrictions-posters-12-april-2021)  
321 [covid-19-restrictions-posters-12-april-2021](https://www.gov.uk/government/publications/step-2-covid-19-restrictions-posters-12-april-2021)), meaning that many children and adults had  
322 undergone a prolonged and acute phase of isolation. As such, individuals who scored low on our  
323 measure of experiential diversity (covering 30 days prior to test) may well have undergone a  
324 sustained and profound period of low experiential diversity, and potentially social isolation. Given  
325 the well-established relationship between stress and memory function<sup>65,66</sup>, it may well be the case  
326 that the effects in the current study are stronger than would be typically observed in a sample of  
327 this type due to prolonged exposure to environmental stressors (e.g., perceived lack of safety and

328 social isolation). While this does not necessarily alter the mechanistic interpretation (e.g., short-  
329 term alterations in specific brain networks or top-down attentional processes; see ref. <sup>67</sup>), it will be  
330 important to conduct future longitudinal studies to gain further insight into the time course and  
331 'dose' dependence of these effects.

332

### 333 **Conclusion**

334 As well as potentially underpinning how memories are encoded and ultimately organised in long-  
335 term memory, the ability to effectively parse conscious experience into meaningful chunks may be  
336 central to how we effectively engage in daily activities<sup>13</sup> and navigate complex social  
337 environments<sup>11</sup>. Despite this, relatively little is known about how inter-individual variation in this  
338 ability emerges. In the current study, we found that the degree to which individuals are exposed to  
339 a diverse range of social and spatial experiences (experiential diversity) was strongly related to  
340 event segmentation ability during a naturalistic movie viewing paradigm. Moreover, this effect was  
341 maintained when controlling for potential confounds, such as anxiety and loneliness. By  
342 demonstrating a link between experiential diversity and a key event encoding mechanism (event  
343 boundary segmentation), this study provides new insights into how individual differences in social  
344 and environmental disconnectedness might influence real-world memory. Future work should  
345 focus on better understanding how experiential diversity shapes encoding of different forms of  
346 event-related information (e.g., social vs. non-social information) across the lifespan, as well as how  
347 everyday memories are recalled and subjectively re-experienced.

348

### 349 **Acknowledgements**

350 This work was supported by the Biotechnology and Biological Sciences Research Council (BBSRC)  
351 [BB/V010549/1] and internal funding from the Department of Psychology, Royal Holloway,  
352 University of London. We would like to thank Saloni Krishnan, Nura Sidarus and Andrew Lawrence  
353 for their valuable discussion.

354

### 355 **CRedit author statement**

356 **Carl J. Hodgetts:** Conceptualization, Investigation, Formal Analysis, Data Curation, Visualization,  
357 Writing – Original Draft, Writing - Reviewing and Editing. **Mark Postans:** Conceptualization,  
358 Investigation, Formal Analysis, Data Curation, Visualization, Writing - Reviewing and Editing;  
359 **Angharad N. Williams:** Conceptualization, Investigation, Formal Analysis, Data Curation,  
360 Visualization, Writing - Reviewing and Editing.

361

362

363 **References**

- 364 1. Richmond, L. L. & Zacks, J. M. Constructing experience: Event models from perception to  
365 action. *Trends Cogn. Sci.* **21**, 962–980 (2017).
- 366 2. Ross, T. W. & Easton, A. The hippocampal horizon: constructing and segmenting experience for  
367 episodic memory. *Neurosci. Biobehav. Rev.* **132**, 181–196 (2022).
- 368 3. Franklin, N. T., Norman, K. A., Ranganath, C., Zacks, J. M. & Gershman, S. J. Structured Event  
369 Memory: a neuro-symbolic model of event cognition. *Psychol. Rev.* **127**, 327–361 (2020).
- 370 4. Kurby, C. A. & Zacks, J. M. Segmentation in the perception and memory of events. *Trends*  
371 *Cogn. Sci.* **12**, 72–79 (2008).
- 372 5. Newton, D. Attribution and the unit of perception of ongoing behavior. *J. Pers. Soc. Psychol.*  
373 **28**, 28–38 (1973).
- 374 6. Sargent, J. Q. *et al.* Event segmentation ability uniquely predicts event memory. *Cognition*  
375 **129**, 241–255 (2013).
- 376 7. Baldassano, C. *et al.* Discovering event structure in continuous narrative perception and  
377 memory. *Neuron* **95**, 709–721.e5 (2017).
- 378 8. Ben-Yakov, A. & Henson, R. N. The hippocampal film editor: Sensitivity and specificity to event  
379 boundaries in continuous experience. *J. Neurosci.* **38**, 10057–10068 (2018).
- 380 9. Reagh, Z. M., Delarazan, A. I., Garber, A. & Ranganath, C. Aging alters neural activity at event  
381 boundaries in the hippocampus and Posterior Medial network. *Nat. Commun.* **11**, 1–12 (2020).
- 382 10. Williams, A. N., Postans, M. & Hodgetts, C. J. How the human brain segments continuous  
383 experience. *J. Neurosci.* (2019).
- 384 11. Boggia, J. & Ristic, J. Social event segmentation. *Q. J. Exp. Psychol.* **68**, 731–744 (2015).
- 385 12. Brunec, I. K., Moscovitch, M. & Barense, M. D. Boundaries shape cognitive representations of  
386 spaces and events. *Trends Cogn. Sci.* **22**, 637–650 (2018).
- 387 13. Richmond, L. L., Gold, D. A. & Zacks, J. M. Event perception: Translations and applications. *J.*  
388 *Appl. Res. Mem. Cogn.* **6**, 111–120 (2017).
- 389 14. Zacks, J. M., Tversky, B. & Iyer, G. Perceiving, remembering, and communicating structure in  
390 events. *J. Exp. Psychol. Gen.* **130**, 29–58 (2001).
- 391 15. Hanson, C. & Hirst, W. On the representation of events: A study of orientation, recall, and  
392 recognition. *J. Exp. Psychol. Gen.* **118**, 136–147 (1989).
- 393 16. Palombo, D. J., Sheldon, S. & Levine, B. Individual differences in autobiographical memory.  
394 *Trends Cogn. Sci.* (2018).
- 395 17. Williams, A. N. *et al.* The role of the pre-commissural fornix in episodic autobiographical  
396 memory and simulation. *bioRxiv* 706150 (2019) doi:10.1101/706150.

- 397 18. Heller, A. S. *et al.* Association between real-world experiential diversity and positive affect  
398 relates to hippocampal–striatal functional connectivity. *Nat. Neurosci.* 1–5 (2020)  
399 doi:10.1038/s41593-020-0636-4.
- 400 19. van Praag, H., Kempermann, G. & Gage, F. H. Neural consequences of environmental  
401 enrichment. *Nat. Rev. Neurosci.* **1**, 191–198 (2000).
- 402 20. Scholz, J., Allemang-Grand, R., Dazai, J. & Lerch, J. P. Environmental enrichment is associated  
403 with rapid volumetric brain changes in adult mice. *NeuroImage* **109**, 190–198 (2015).
- 404 21. Clemenson, G. D., Deng, W. & Gage, F. H. Environmental enrichment and neurogenesis: From  
405 mice to humans. *Curr. Opin. Behav. Sci.* **4**, 56–62 (2015).
- 406 22. DiNapoli, E. A., Wu, B. & Scogin, F. Social isolation and cognitive function in Appalachian older  
407 adults. *Res. Aging* **36**, 161–179 (2014).
- 408 23. Read, S., Comas-Herrera, A. & Grundy, E. Social isolation and memory decline in later-life. *J.*  
409 *Gerontol. - Ser. B Psychol. Sci. Soc. Sci.* **75**, 367–376 (2020).
- 410 24. Bennett, J., Mcrae, P., Levy, L. & Frick, K. Long-term continuous, but not daily, environmental  
411 enrichment reduces spatial memory decline in aged male mice. *Neurobiol. Learn. Mem.* **85**,  
412 139–152 (2006).
- 413 25. Evans, I. E. M. *et al.* Social Isolation, Cognitive reserve, and cognition in older people with  
414 mental health problems. *PLoS One* (2018) doi:10.1016/j.jalz.2018.06.2590.
- 415 26. Fratiglioni, L., Wang, H.-X., Ericsson, K., Maytan, M. & Winblad, B. Influence of social network on  
416 occurrence of dementia: a community-based longitudinal study. *The Lancet* **355**, 1315–1319  
417 (2000).
- 418 27. Coutrot, A. *et al.* Entropy of city street networks linked to future spatial navigation ability.  
419 *Nature* **604**, 104–110 (2022).
- 420 28. Clemenson, G. D., Henningfield, C. M. & Stark, C. E. L. Improving hippocampal memory through  
421 the experience of a rich minecraft environment. *Front. Behav. Neurosci.* **13**, 1–13 (2019).
- 422 29. Newberry, K. M., Feller, D. P. & Bailey, H. R. Influences of domain knowledge on segmentation  
423 and memory. *Mem. Cognit.* **49**, 660–674 (2021).
- 424 30. Chang, A., Murray, E. & Yassa, M. A. Mnemonic discrimination of similar face stimuli and a  
425 potential mechanism for the “other race” effect. *Behav. Neurosci.* **129**, 666–672 (2015).
- 426 31. Prado Lima, M. G. *et al.* Environmental enrichment and exercise are better than social  
427 enrichment to reduce memory deficits in amyloid beta neurotoxicity. *Proc. Natl. Acad. Sci.* **115**,  
428 E2403–E2409 (2018).
- 429 32. Hasson, U. *et al.* Neurocinematics: The neuroscience of film. *Projections* **2**, 1–26 (2008).
- 430 33. Zacks, J. M., Speer, N. K., Vettel, J. M. & Jacoby, L. L. Event understanding and memory in  
431 healthy aging and dementia of the alzheimer type. *Psychol. Aging* **21**, 466–482 (2006).

- 432 34. Kurby, C. A. & Zacks, J. M. Age differences in the perception of hierarchical structure in events.  
433 *Mem. Cognit.* **39**, 75–91 (2011).
- 434 35. Lewis, P. A., Rezaie, R., Brown, R., Roberts, N. & Dunbar, R. I. M. Ventromedial prefrontal volume  
435 predicts understanding of others and social network size. *NeuroImage* **57**, 1624–1629 (2011).
- 436 36. Stiller, J. & Dunbar, R. I. M. Perspective-taking and memory capacity predict social network size.  
437 *Soc. Netw.* **29**, 93–104 (2007).
- 438 37. Buys, C. J. & Larson, K. L. Human sympathy groups. *Psychol. Rep.* **45**, 547–553 (1979).
- 439 38. Goodman, A., Wrigley, J., Silversides, K. & Venus-Balgobin, N. *Measuring your impact on*  
440 *loneliness in later life*. (2015).
- 441 39. Spielberger, C. D. State–Trait Anxiety Inventory for adults. (1983).
- 442 40. Seongho, K. ppcor: An R package for a fast calculation to semi-partial correlation coefficients.  
443 *Commun. Stat. Appl. Methods* **22**, 665–674 (2015).
- 444 41. Diedenhofen, B. & Musch, J. Cocor: A comprehensive solution for the statistical comparison of  
445 correlations. *PLoS ONE* **10**, 1–12 (2015).
- 446 42. Dalgleish, T. & Werner-Seidler, A. Disruptions in autobiographical memory processing in  
447 depression and the emergence of memory therapeutics. *Trends Cogn. Sci.* **18**, 596–604 (2014).
- 448 43. Barry, T. J., Chiu, C. P. Y., Raes, F., Ricarte, J. & Lau, H. The neurobiology of reduced  
449 autobiographical memory specificity. *Trends Cogn. Sci.* **22**, 1038–1049 (2018).
- 450 44. Zlomuzica, A. *et al.* Episodic memories in anxiety disorders: Clinical implications. *Front. Behav.*  
451 *Neurosci.* **8**, 1–19 (2014).
- 452 45. Ben-Yakov, A. & Henson, R. N. The hippocampal film-editor: sensitivity and specificity to event  
453 boundaries in continuous experience. *bioRxiv* 273409 (2018) doi:10.1101/273409.
- 454 46. Ranganath, C. & Ritchey, M. Two cortical systems for memory-guided behaviour. *Nat. Rev.*  
455 *Neurosci.* **13**, 713–726 (2012).
- 456 47. Spreng, R. N., Mar, R. A. & Kim, A. S. N. The common neural basis of autobiographical memory,  
457 prospection, navigation, theory of mind, and the default mode: A quantitative meta-analysis. *J.*  
458 *Cogn. Neurosci.* **21**, 489–510 (2009).
- 459 48. Tost, H., Champagne, F. A. & Meyer-Lindenberg, A. Environmental influence in the brain,  
460 human welfare and mental health. *Nat. Neurosci.* **18**, 4121–4131 (2015).
- 461 49. Nithianantharajah, J. & Hannan, A. J. Enriched environments, experience-dependent plasticity  
462 and disorders of the nervous system. *Nat. Rev. Neurosci.* **7**, 697–709 (2006).
- 463 50. Wang, L. *et al.* Enriched physical environment attenuates spatial and social memory  
464 impairments of aged socially isolated mice. *Int. J. Neuropsychopharmacol.* **21**, 1114–1127  
465 (2018).

- 466 51. Zorzo, C., Méndez-López, M., Méndez, M. & Arias, J. L. Adult social isolation leads to anxiety and  
467 spatial memory impairment: Brain activity pattern of COx and c-Fos. *Behav. Brain Res.* **365**,  
468 170–177 (2019).
- 469 52. Smith, B. M., Yao, X., Chen, K. S. & Kirby, E. D. A larger social network enhances novel object  
470 location memory and reduces hippocampal microgliosis in aged mice. *Front. Aging Neurosci.*  
471 **10**, 142 (2018).
- 472 53. Biggio, F. *et al.* Social enrichment reverses the isolation-induced deficits of neuronal plasticity  
473 in the hippocampus of male rats. *Neuropharmacology* **151**, 45–54 (2019).
- 474 54. Huang, F. L., Huang, K.-P., Wu, J. & Boucheron, C. Environmental enrichment enhances  
475 neurogranin expression and hippocampal learning and memory but fails to rescue the  
476 impairments of neurogranin null mutant mice. *J. Neurosci.* **26**, 6230–6237 (2006).
- 477 55. Kempermann, G., Kuhn, H. G. & Gage, F. H. More hippocampal neurons in adult mice living in  
478 an enriched environment. *Nature* **386**, 493–495 (1997).
- 479 56. Seeman, T. E., Lusignolo, T. M., Albert, M. & Berkman, L. Social relationships, social support, and  
480 patterns of cognitive aging in healthy, high-functioning older adults: MacArthur Studies of  
481 Successful Aging. *Health Psychol.* **20**, 243–255 (2001).
- 482 57. Zovetti, N., Rossetti, M. G., Perlini, C., Brambilla, P. & Bellani, M. Neuroimaging studies exploring  
483 the neural basis of social isolation. *Epidemiol. Psychiatr. Sci.* (2021)  
484 doi:10.1017/S2045796021000135.
- 485 58. Stahn, A. C. *et al.* Brain changes in response to long antarctic expeditions. *N Engl J Med* **3**  
486 (2019).
- 487 59. Spreng, R. N. *et al.* The default network of the human brain is associated with perceived social  
488 isolation. *Nat. Commun.* **11**, 1–11 (2020).
- 489 60. Williams, A. N. *et al.* The role of the pre-commissural fornix in episodic autobiographical  
490 memory and simulation. *Neuropsychologia* **142**, (2020).
- 491 61. Twenge, J. M., Catanese, K. R. & Baumeister, R. F. Social exclusion and the deconstructed state:  
492 time perception, meaninglessness, lethargy, lack of Emotion, and self-awareness. *J. Pers. Soc.*  
493 *Psychol.* **85**, 409–423 (2003).
- 494 62. Bläsing, B. E. Segmentation of dance movement: effects of expertise, visual familiarity, motor  
495 experience and music. *Front. Psychol.* **5**, (2015).
- 496 63. Cacioppo, J. T. & Hawkley, L. C. Perceived social isolation and cognition. *Trends Cogn. Sci.* **13**,  
497 447–454 (2009).
- 498 64. Zacks, J. M. Event perception and memory. *Annu. Rev. Psychol.* **71**, 1–34 (2019).

- 499 65. Gagnon, S. A. & Wagner, A. D. Acute stress and episodic memory retrieval: neurobiological  
500 mechanisms and behavioral consequences: Acute stress and episodic memory retrieval. *Ann.*  
501 *N. Y. Acad. Sci.* **1369**, 55–75 (2016).
- 502 66. Shields, G. S., Sazma, M. A., McCullough, A. M. & Yonelinas, A. P. The effects of acute stress on  
503 episodic memory: A meta-analysis and integrative review. *Psychol. Bull.* **143**, 636–675 (2017).
- 504 67. Brodt, S. *et al.* Fast track to the neocortex: A memory engram in the posterior parietal cortex.  
505 *Science* **362**, 1045–1048 (2018).

506

507

508
